# Supplementary material
Source: PubMed Central journal article supplement (PMC2850421)
Supplement: mmc1.pdf [file mmc1.pdf]

## Supplemental Data

### Autosomal-Dominant Woolly Hair Resulting from Disruption of Keratin 74 (*KRT74*), a Potential Determinant of Human Hair Texture

Yutaka Shimomura, Muhammad Wajid, Lynn Petukhova, Mazen Kurban and Angela M. Christiano

**Figure S1. Results of statistical analysis.** (A) Whole genome linkage analysis was performed on SNP data under the assumption of an autosomal dominant mode of inheritance of a fully penetrant rare allele (frequency of 0.001). A suggestive maximum LOD score of 1.56 was found on chromosome 12. (B) The haplotype-based haplotype relative risk (HHRR) analysis was performed on the SNP data across chromosome 12 to more precisely localize the disease locus and implicated 12q13. (C) Microsatellite markers were chosen for fine mapping across the putative region and confirmed linkage across the type II keratin gene cluster.

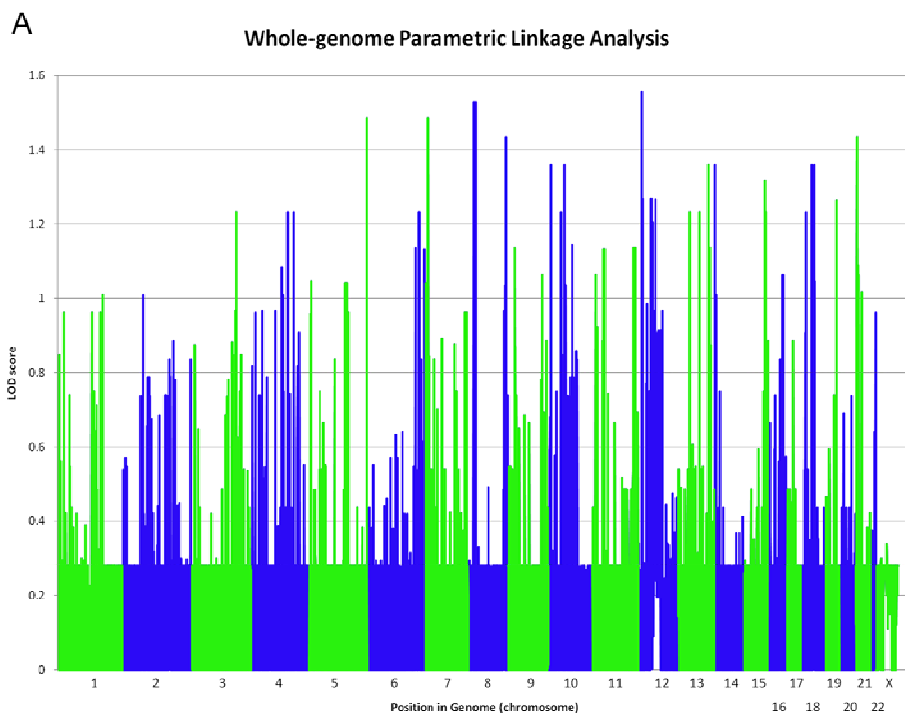

**B**

**HRR on Chromosome 12**

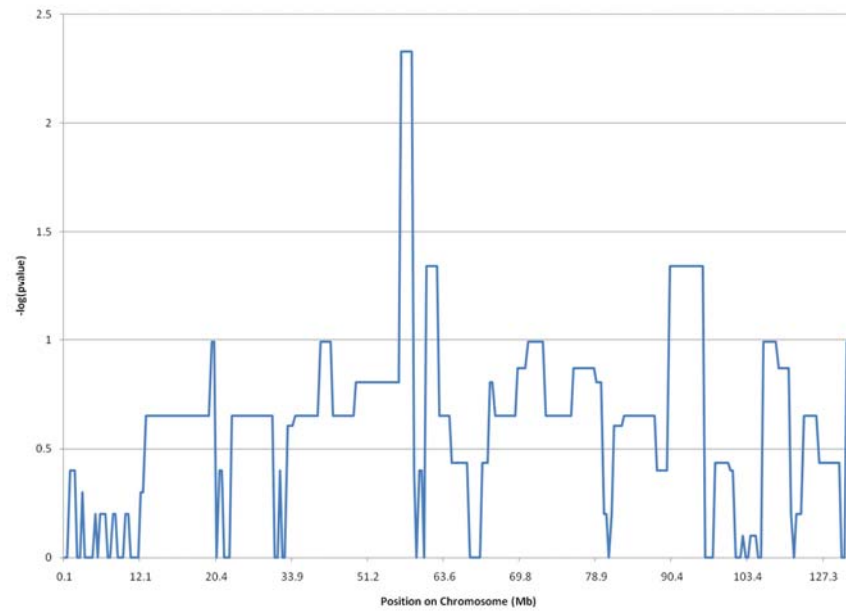

**C**

**Finmapping with Microsatellite Markers**

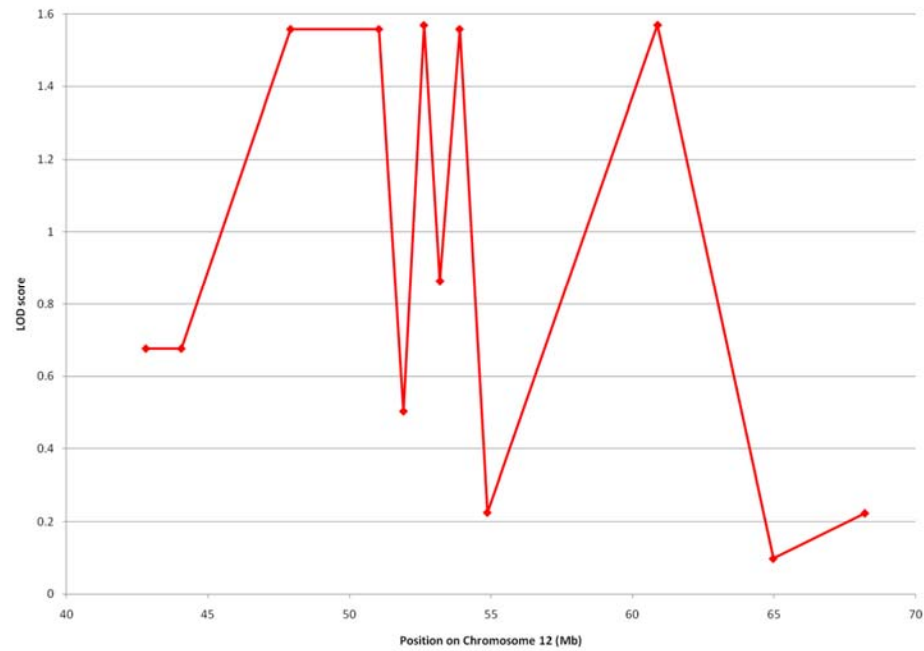

**Figure S2. Mutant K74 protein disrupts endogenous KIF formation in MCF-10A cells.** (A-C) Ectopically expressed wild type (Wt) K74 protein forms a KIF network via heterodimerization with endogenous K14 protein. (D-F) The p.Asn148Lys mutant (Mut) K74 protein causes a collapse of the endogenous KIF network around the nucleus. Scale bar: 20  $\mu$ m.

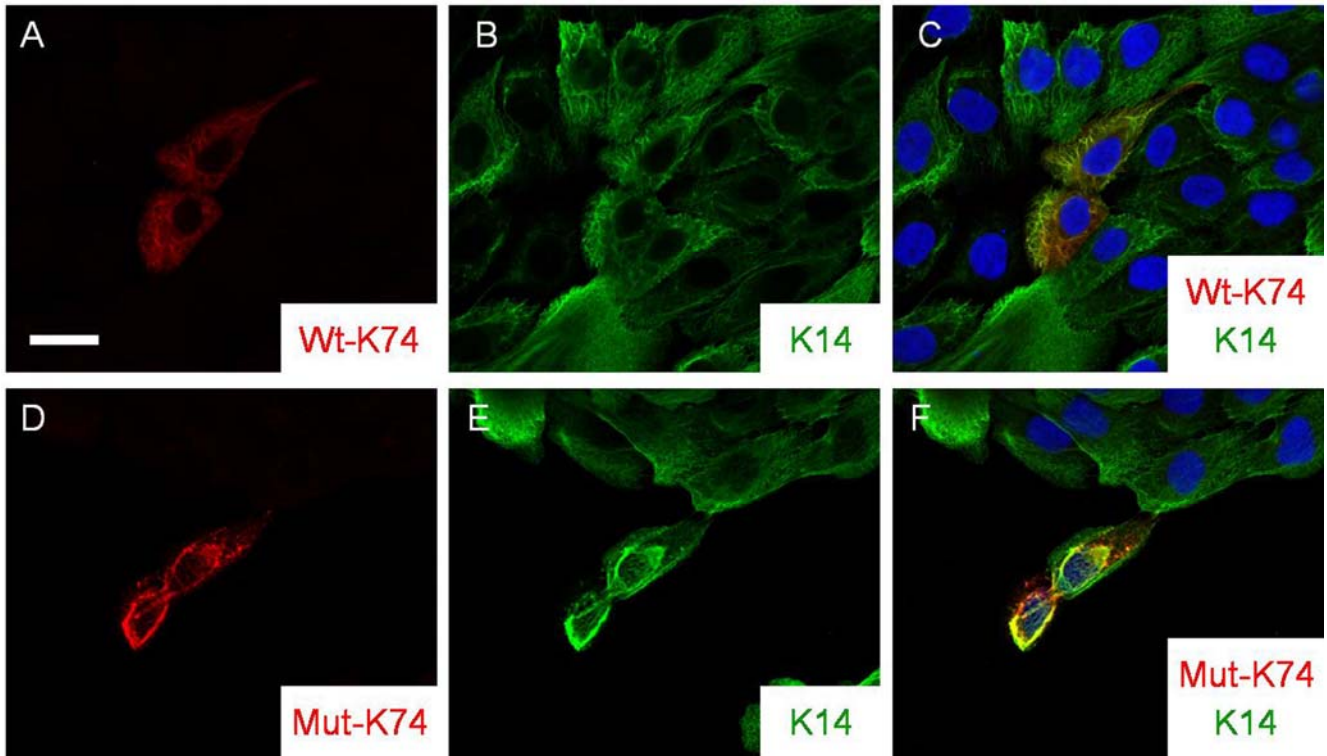

**Figure S3. (A)** Identification of a heterozygous mutation c.1318G>A (p.Glu440Lys) in mouse *Krt71* gene in *Caracul-like 4 (Cal4)* allele. **(B)** Schematic representation of mouse K71 protein and location of all known *Krt71* mutations. The helix initiation motif (HIM) and helix termination motif (HTM) are colored in yellow and blue, respectively. The mutation p.Glu440Lys in the *Cal4* allele identified in this study is indicated in red. c.172\_181del in *Reduced coat 3 (Rco3)* allele is a recessive mutation, while the others are dominant mutations and occurred in either the HIM or the HTM of the K71 protein.

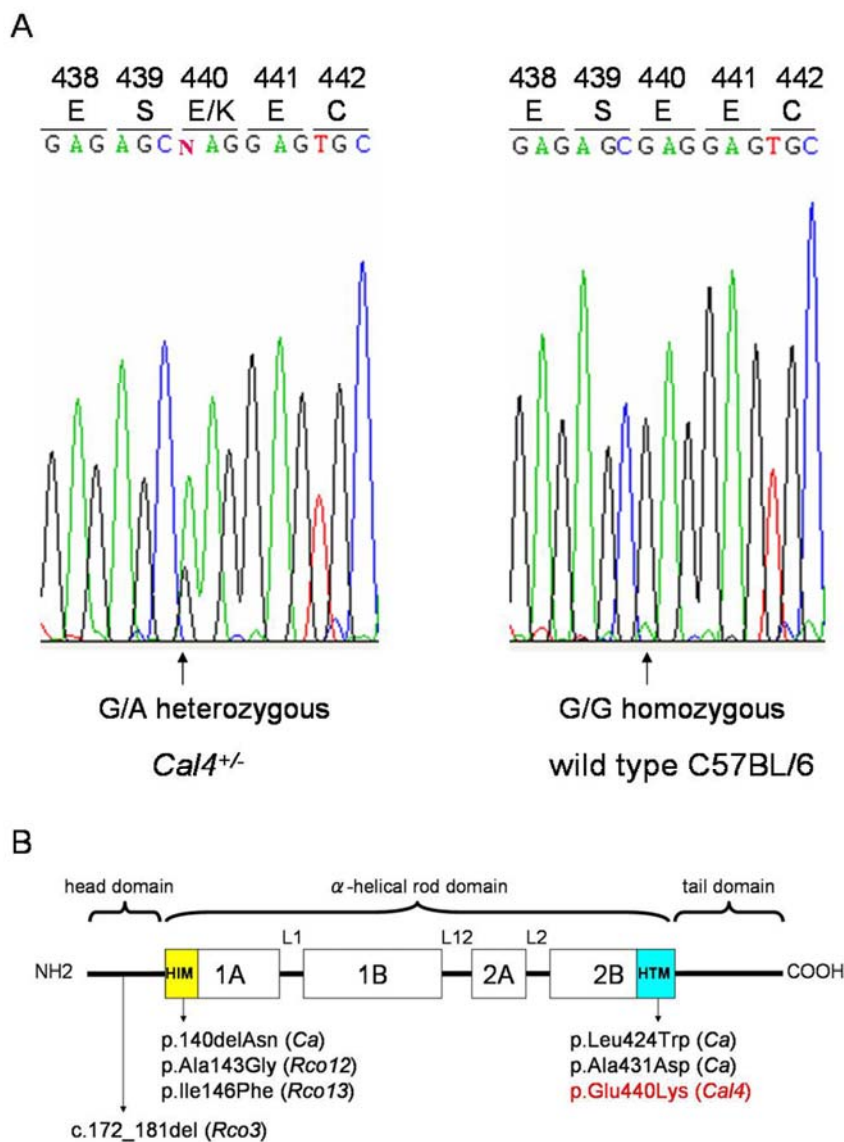

**Figure S4. Genetic differentiation between African and European populations at the *KRT71-74* gene cluster.** Allele frequencies for all SNPs in each of four *KRT* genes located on chromosome 12q13 were downloaded for an African population (YRI) and a population of European ancestry (CEU) from HapMap. The differentiation between the two populations for each SNP was calculated as  $F_{ST} = \frac{\delta^2}{\theta(2-\theta)}$  where  $\delta$  is the difference in reference allele frequencies between populations and  $\theta$  denotes the sum of the reference allele frequencies. Pairwise  $F_{ST}$  is plotted as a function of physical position for all four *KRT* genes examined in the top panel. In the bottom panel, the location of the SNPs is plotted relative to the *KRT71* gene. Coding SNPs are indicated by red diamonds and non-coding by black diamonds. The red arrow indicates the position of rs10783518, a coding SNP that results in a non-synonymous change in amino acids, p.Gly464Val. Pairwise  $F_{ST}$  values were calculated for all SNPs on chromosome 12 and an  $F_{ST}$  of 0.3 corresponded to the 97<sup>th</sup> percentile of scores (data not shown).

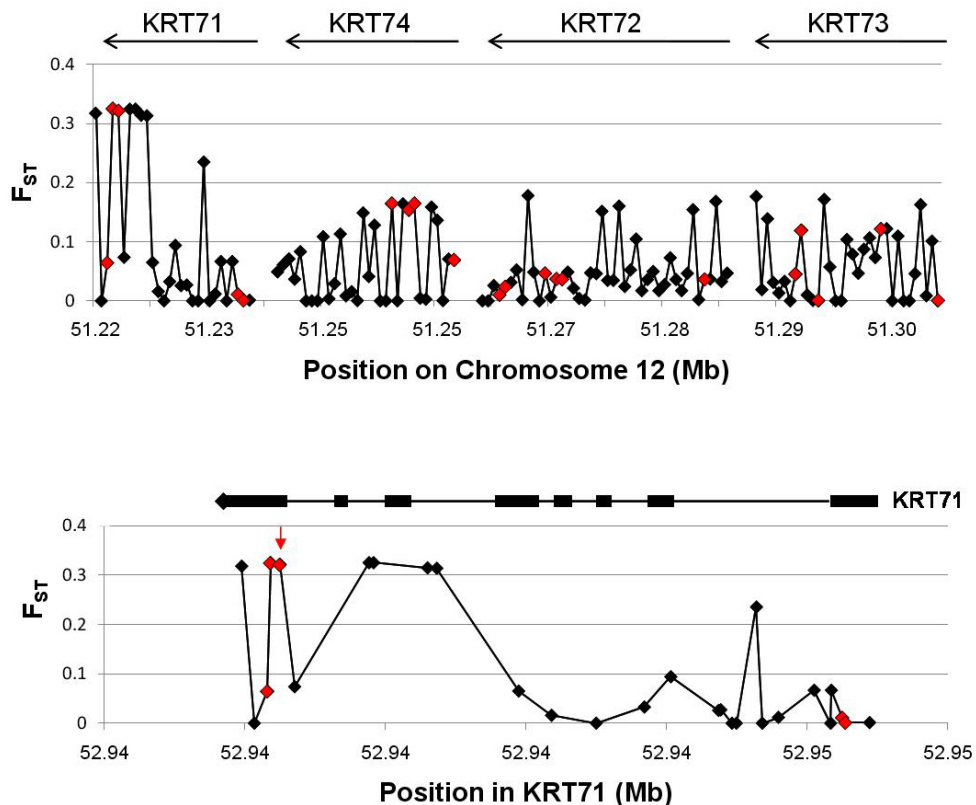

**Table S1. Primers used in this study**

| Primer name                                                                                                              | Forward primer (5' to 3')     | Reverse primer (5' to 3')       | product size (bp) |
|--------------------------------------------------------------------------------------------------------------------------|-------------------------------|---------------------------------|-------------------|
| <b>Primers used in sequencing analysis of human <i>KRT71-74</i> genes</b>                                                |                               |                                 |                   |
| KRT71-ex 1                                                                                                               | AAGGCACCTGCCAGTCCTCA          | GTCACCCTGTTGATGGGATGTA          | 682               |
| KRT71-ex 2                                                                                                               | CTGTGAGAGACACGTGTGACT         | CATTTAAGCTGGGGTACTGC            | 360               |
| KRT71-ex 3                                                                                                               | CAGCACCTGTATCTTCTGATG         | CACCTTGGCAGGCTCTGTTC            | 239               |
| KRT71-ex 4                                                                                                               | CTCCTTTCCCAAGGCAAAGT          | AACTGAGGGGTCTCACTGAG            | 333               |
| KRT71-ex 5                                                                                                               | TGGGTTCCAGCCTCCAAGAT          | GCACGATCTGTCTCCATCTG            | 343               |
| KRT71-ex 6                                                                                                               | CAGATGGAGACAGATCGTGC          | CCATGTTCTCAGCAGCTCATC           | 327               |
| KRT71-ex 7                                                                                                               | CTTGCCCACTCTAAGGAC            | CTGGATTGAGATGTGTTAGGC           | 393               |
| KRT71-ex 8                                                                                                               | GCTGATGGTGGCAGTAGCT           | GCACACAGAGGGTGTCACTA            | 191               |
| KRT71-ex 9                                                                                                               | TGCACCTCCCACTCAGCT            | CAGGTGTATGGGAGCAGGAC            | 438               |
| KRT72-ex 1                                                                                                               | CAAGAGGCCTCAAGGGATCT          | GGCTCGGAGAGGTTATGACC            | 694               |
| KRT72-ex 2                                                                                                               | GAGGCAACAACATGGGGACT          | GTTTGGAGAACCGGTGTAGG            | 434               |
| KRT72-ex 3                                                                                                               | AGGGGTATGGGAATCCCAGT          | GGGAAGTTAGAGTGCCAGTC            | 315               |
| KRT72-ex 4                                                                                                               | GTAGCCATTGCACTGCACGT          | CAGTAGGGCCTTGGTGAATG            | 417               |
| KRT72-ex 5                                                                                                               | GAGGGACAGTGAGGAATTTGC         | GAGGTCTTGACTGAGCCAA             | 384               |
| KRT72-ex 6                                                                                                               | ACTCTGCCAAGGCTCTCATG          | ACCTACAGTGTGTAGGCTGC            | 436               |
| KRT72-ex 7                                                                                                               | CTCCAAGCAGTTGCCATCAGT         | TTCAGTAGGACCTAAACAGGAC          | 424               |
| KRT72-ex 8                                                                                                               | CATTCTGCGTGGAGAGGCTT          | CATCCACTGCTTCCCCTTAG            | 297               |
| KRT72-ex 9                                                                                                               | ATCTCAGCAGGAAGCCACTG          | TGATGGACTCCTTGCACTG             | 486               |
| KRT73-ex 1                                                                                                               | ATCACAGGCTGGTGAAGTGC          | CAGCACCTGGGGAGCTTTCA            | 677               |
| KRT73-ex 2                                                                                                               | CCTGTCCAGGAAGGGAATTC          | CTTGCTGGGACAGATGAACC            | 396               |
| KRT73-ex 3                                                                                                               | CTGGTGTGTTGGGATGGACT          | CTTCAGCACTTTGGCTCCAG            | 324               |
| KRT73-ex 4                                                                                                               | AAGTCTGGGCAGCTAGCTA           | GAGGTGCCCTGGACTGCTTA            | 306               |
| KRT73-ex 5                                                                                                               | GGAAGTGCAGCTTCCATCTG          | GGCAGACAAGACAGAGTCTG            | 353               |
| KRT73-ex 6                                                                                                               | CACAGTCTCTGTACCAGGCT          | GGATGAGAGCAGGACCTCCA            | 330               |
| KRT73-ex 7                                                                                                               | GGTCAACCATTGAGAGCATG          | TGGGAACTTTAAGGTGGAGAC           | 358               |
| KRT73-ex 8                                                                                                               | CAGCCAGTGCCATCTGGCAA          | AGAGCCAAGCTCTTCCTCAG            | 275               |
| KRT73-ex 9                                                                                                               | TTGGGAGTCTTGCAAGACTG          | AAGAGTCCGGAGCAGTCTGC            | 513               |
| KRT74-ex 1                                                                                                               | ACTCTGGGTGCCCATCAGT           | CTTCCAGCCACAGTGTGCA             | 643               |
| KRT74-ex 2                                                                                                               | GGGTGGAGAGTCAAGACATG          | AAGGGATGTGAGCTCCTGAC            | 471               |
| KRT74-ex 3                                                                                                               | CTCCTGTCACTAGCCTCTTAC         | GCTGAAGTCTGAGCAGAGT             | 269               |
| KRT74-ex 4                                                                                                               | CTCCAGGCATAACAGAGCTG          | TCCATGGTCTCCTGGTGCA             | 437               |
| KRT74-ex 5                                                                                                               | CGTGGATCCTAGCAGCCTAT          | CCTCACATTCACTGTGCAGGT           | 349               |
| KRT74-ex 6                                                                                                               | TTACAGGACCCTTCCCAGT           | CCAGCTCTGATGGTAGGGTA            | 358               |
| KRT74-ex 7                                                                                                               | CCCATCTGCAAAATGAGGGCAT        | CATGTTGTTCTCCAGGTGGC            | 397               |
| KRT74-ex 8                                                                                                               | GCGATAGTGTGAGTTTCGTAAG        | CTTCTTGGGAGGTGAGACAG            | 261               |
| KRT74-ex 9                                                                                                               | TTGGGGACAGCCGTTACCAT          | CGTTAGTCCACATGGGACCTA           | 486               |
| <b>Primers used in sequencing analysis of mouse <i>Krt71-74</i> genes</b>                                                |                               |                                 |                   |
| Krt71-ex 1                                                                                                               | AGGCACCTGCTGGTCCTCA           | CCAGCATCATGTACAGTAACTG          | 648               |
| Krt71-ex 7                                                                                                               | GGGTGTTTGTCTCCTGGATC          | CTAGGGCTTCGCACATGCTA            | 410               |
| Krt72-ex 1                                                                                                               | GGAATTTAAGGGGCGAGCT           | TCCCCTTCACTGTGTGAATGC           | 636               |
| Krt72-ex 7                                                                                                               | CTCCAGTCTGTCCAACCTG           | GGGTGGCATTGATGCTTTGC            | 541               |
| Krt73-ex 1                                                                                                               | ATCACAAAGCGGGGAACAGTC         | GGGTAGCATCATCCTATCTCC           | 607               |
| Krt73-ex 7                                                                                                               | AAGGCCATCCGAGATTAGC           | GTGGTTCAACTGGAGAGCATC           | 404               |
| Krt74-ex 1                                                                                                               | GAATTCAGGTCATGCAGTGAC         | CACAGGAAACAGGAGAACTGC           | 501               |
| Krt74-ex 7                                                                                                               | CTCATAGGCACAACCGGAGC          | TGCCAGCAAGGCTGTGCTCA            | 451               |
| <b>Primers used in segregation analysis and screening assays for the mutation c.444C&gt;G in human <i>KRT74</i> gene</b> |                               |                                 |                   |
| KRT74-Acul                                                                                                               | AGGCCTGGCTCTGGGTATGGA         | CTTCCAGCCACAGTGTGCA             | 338               |
| <b>Primers used in cloning of human <i>KRT74</i>-cDNA into the mammalian expression vector pCXN2.1</b>                   |                               |                                 |                   |
| KRT74-rtPCR                                                                                                              | AAAAGAATTCAACCTTTCCACCATGAGTC | AAAACCTCGAGTCACCTCTTCTTCCAAGTGC | 1665              |

**Table S2. Pathogenic mutations in the Asn residue at position 9 in the HIM of human type II keratins.** Asn to Lys substitutions at amino acid position 9 in the HIM are indicated in bold letters.

| Keratins<br>(previous<br>nomenclature) | Mutations          | diseases                                      | references |
|----------------------------------------|--------------------|-----------------------------------------------|------------|
| K1                                     | p.Asn188Ser        | bullous congenital ichthyosiform erythroderma | 18, 19     |
| K1                                     | p.Asn188Thr        | bullous congenital ichthyosiform erythroderma | 20         |
| K1                                     | <b>p.Asn188Lys</b> | bullous congenital ichthyosiform erythroderma | 21         |
| K2 (K2e)                               | p.Asn186Tyr        | ichthyosis bullosa of Siemens                 | 22         |
| K2 (K2e)                               | <b>p.Asn186Lys</b> | ichthyosis bullosa of Siemens                 | 23         |
| K5                                     | p.Asn176Ser        | epidermolysis bullosa simplex                 | 24         |
| K6a                                    | p.Asn171Asp        | pachyonychia congenita type I                 | 25         |
| K6a                                    | p.Asn171Tyr        | pachyonychia congenita type I                 | 25         |
| K6a                                    | p.Asn171Ser        | pachyonychia congenita type I                 | 26         |
| K6a                                    | <b>p.Asn171Lys</b> | pachyonychia congenita type I                 | 27, 28     |
| K74 (K6irs4)                           | <b>p.Asn148Lys</b> | autosomal dominant woolly hair                | This study |
| K86 (Hb6)                              | p.Asn114Asp        | monilethrix                                   | 29         |
| K86 (Hb6)                              | p.Asn114His        | monilethrix                                   | 30         |
